# Supplementary material for: Cultural Consensus in Ethnotaxonomy - Lessons From a Fishing Community in Northeast Brazil
Source: Research Square preprint supplement (doi:10.21203/rs.3.rs-1300352/v1), 2022-02-01
Supplement: Supplementary file 1 [file a7808637319fad203ac64820.docx]

Supplementary Material

1. Portuguese originals from the translated excerpts

E.68: *xareu e bagre são dois peixes carregados.*

*Xareu and bagre are two carregado fish.*

D.49: *o xareu quase ninguém gosta/ a carne é escura/ de terceira qualidade/ (...) bagre é diferente dos outros/ é fora do normal.*

*Almost no one likes xareu/ its meat is dark/ of third quality/ (…) bagre is different from the others/ it's out of the ordinary.*

L.42: *xareu e bagre são os mais diferentes/ são ruins de comer.*

*Xareu and bagre are the most different ones/ they are not so tasty.*

E.33: *não gosto muito do xareu/ tem verme/ a gente usa mais pra isca/ (...) é peixe de couro/ (...) tem cheiro ruim/ não tem gosto/ (...) bagre fidalgo não tem escama/ só couro.*

*I don’t like xareu so much/ it has worms/ we use it for bait mainly/ (…) it’s a scaleless fish/ (…) it smells bad/ there’s no taste/ (…) bagre fidalgo has no scale/ just leather.*

Table S1. Triad Task Photographs

| **Ethnospecies (scientific name)** | **Photographs** |
| --- | --- |
| Bagre Fidalgo (*Bagre bagre*) | 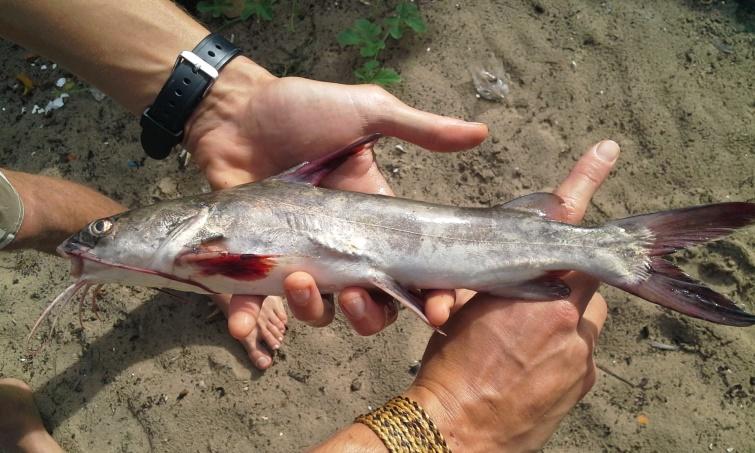  Photo by author |
| Carapeba(*Eugerres brasilianus*) | 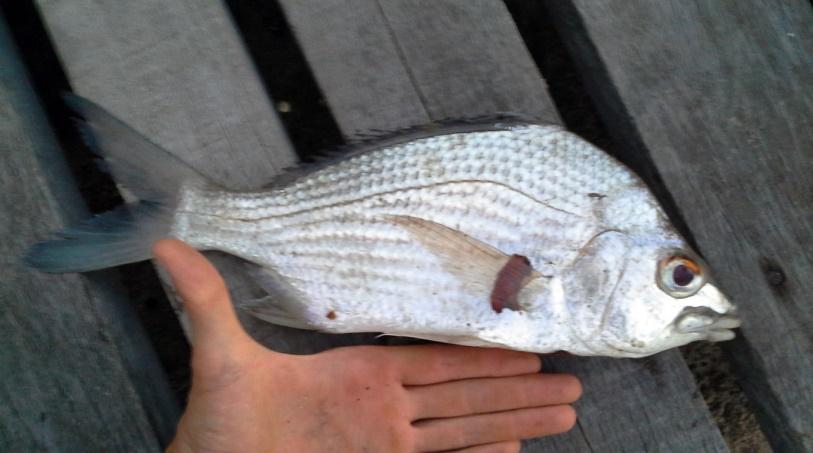  Photo by author |
| Cavala (*Scomberomorus cavala*) | *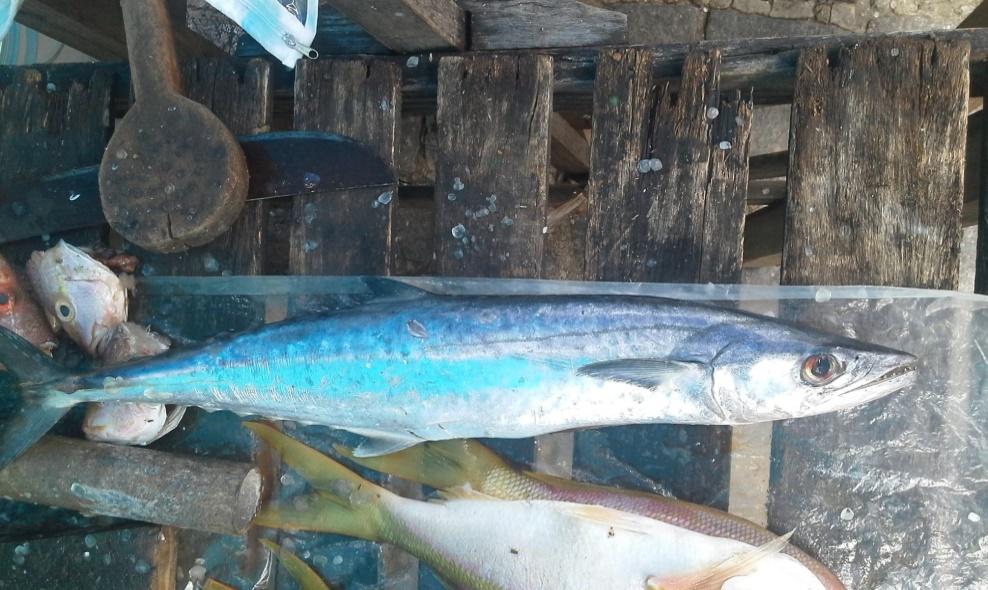*  Photo by author |
| Corvina (*Micropogonias furnieri*) | *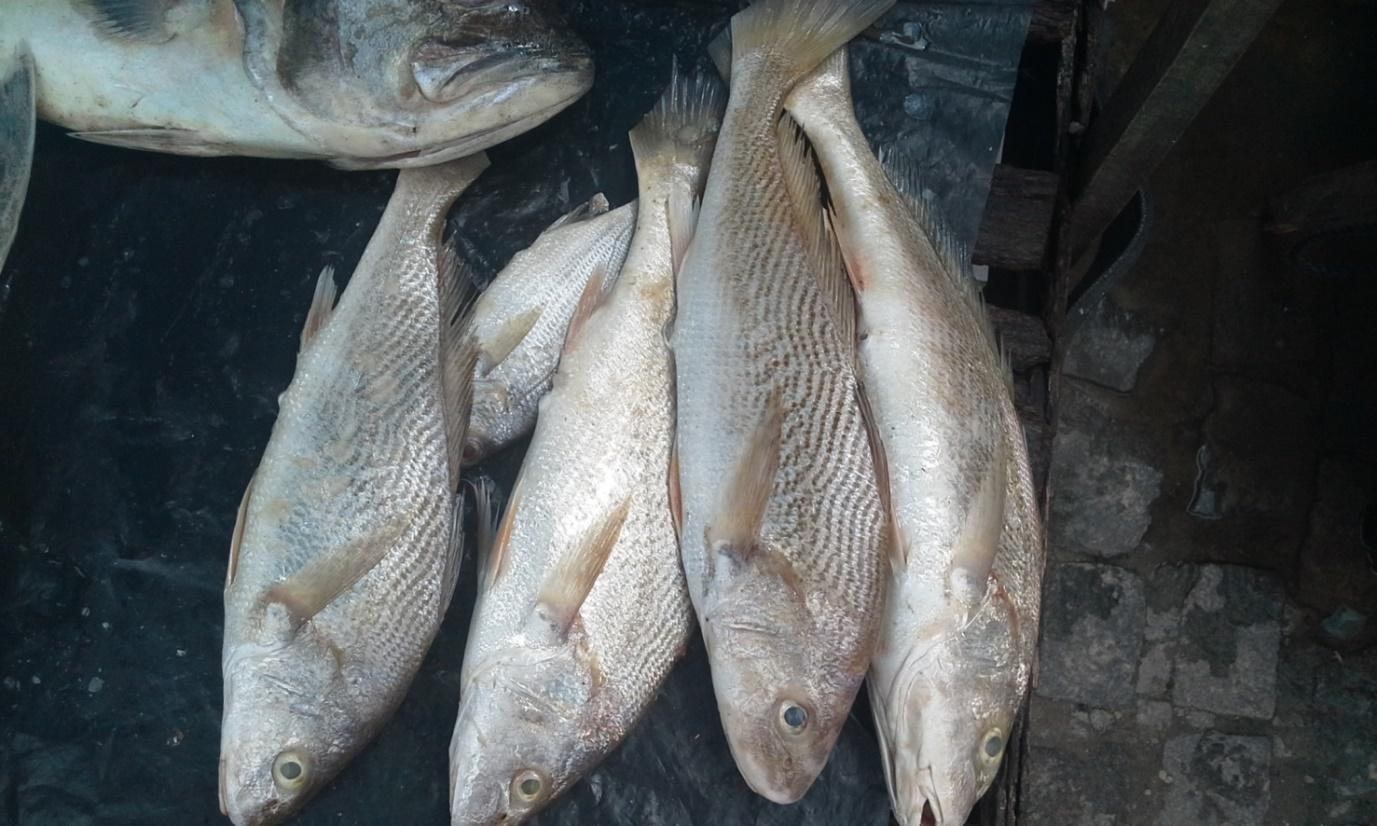*  Photo by author |
| Curimã  (*Mugil liza*) | *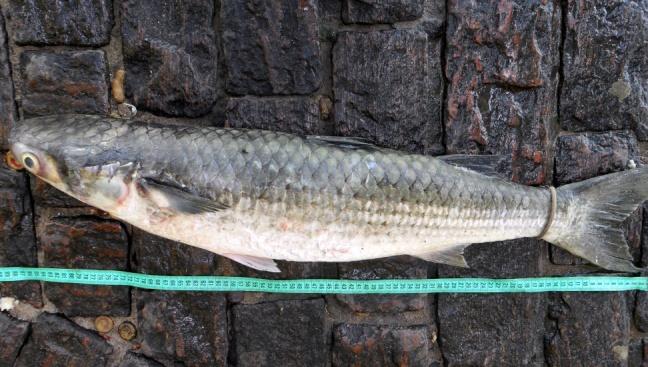*  Photo by José Amorim dos Reis Filho |
| Pescada amarela (*Cynoscion acoupa*) | *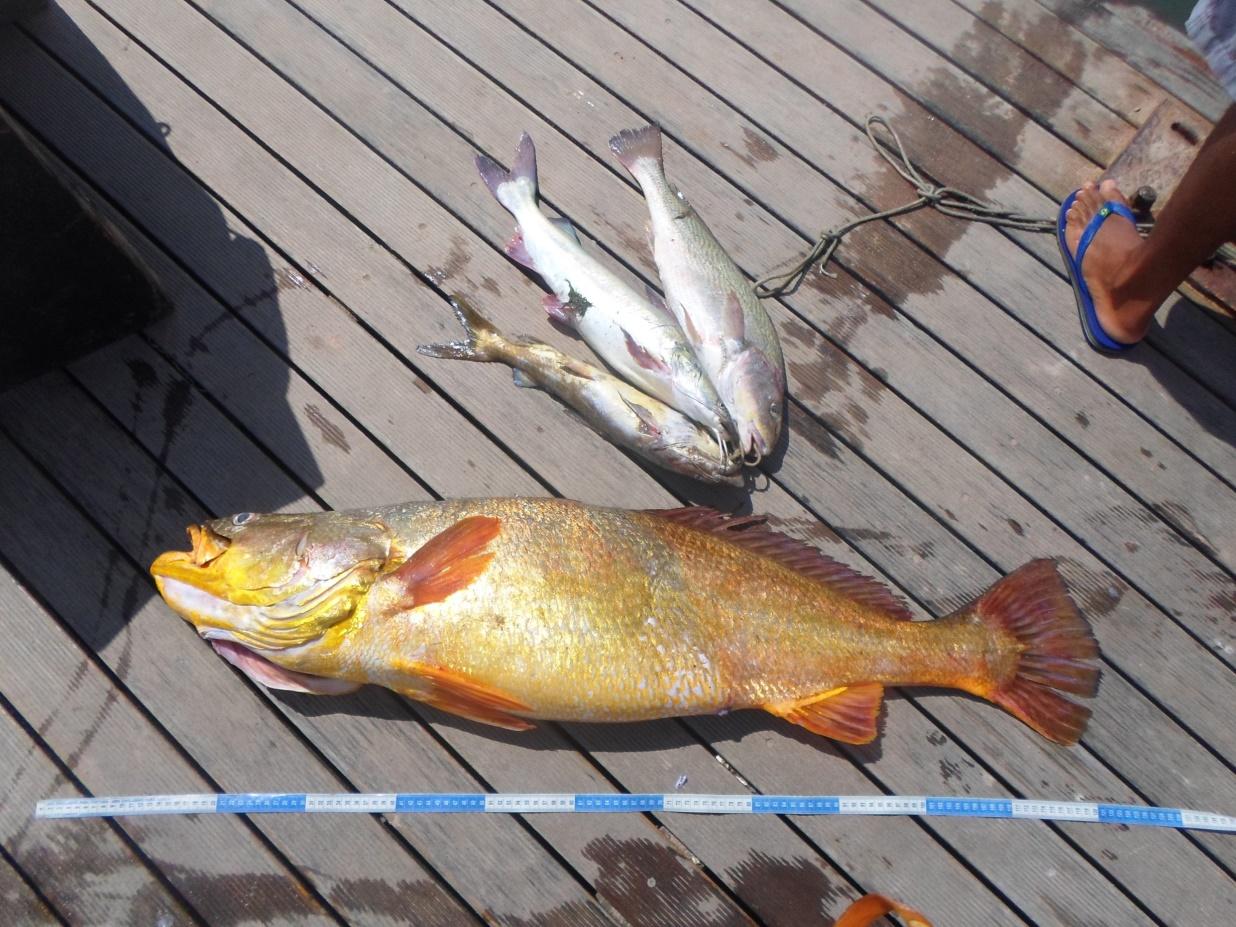*  Photo by José Amorim dos Reis Filho |
| Pescada branca (*Cynoscion leiarchus*) | 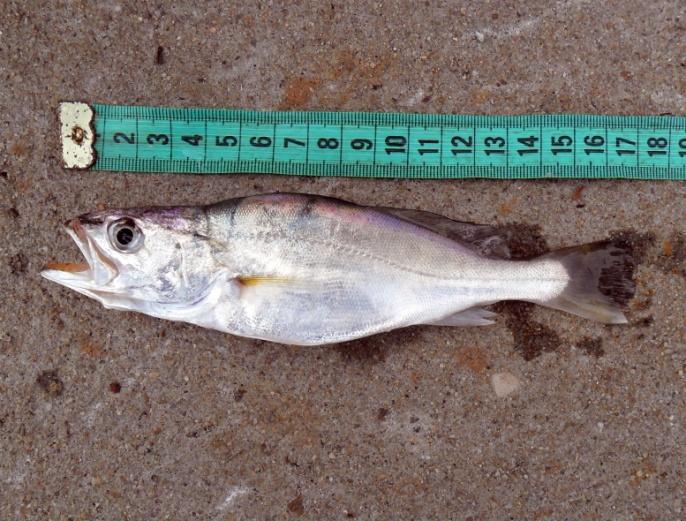  Photo by José Amorim dos Reis Filho |
| Robalo branco (*Centropomus parallelus*) | *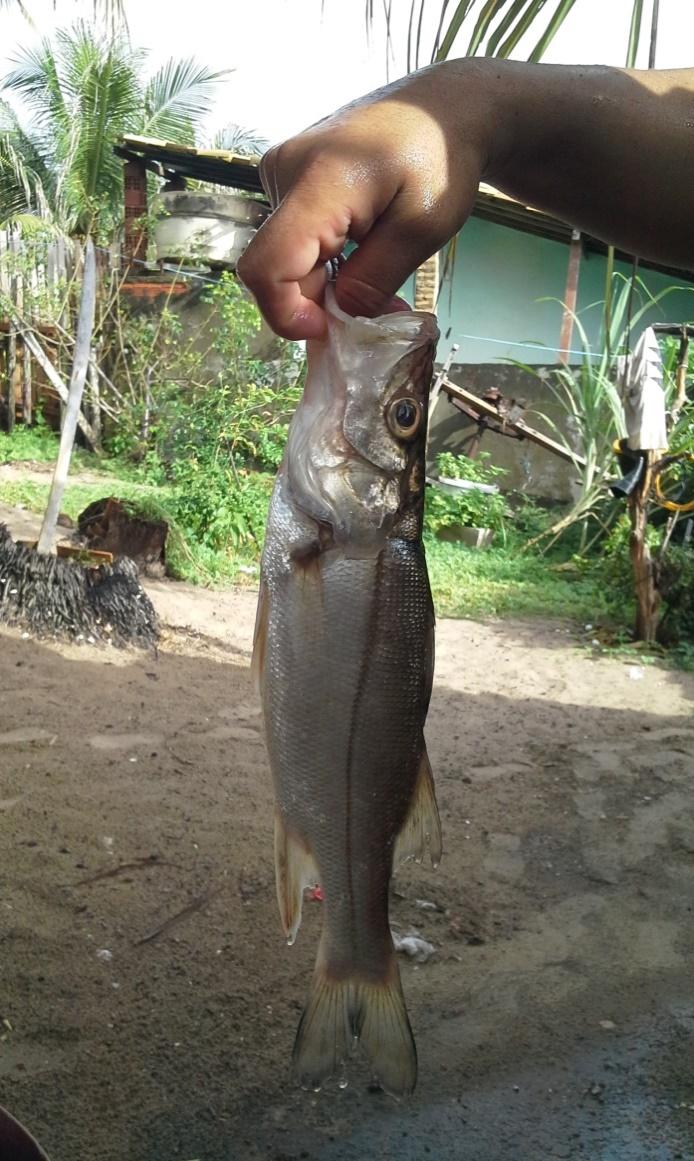*  Photo by author |
| Tainha  (*Mugil curema*) | *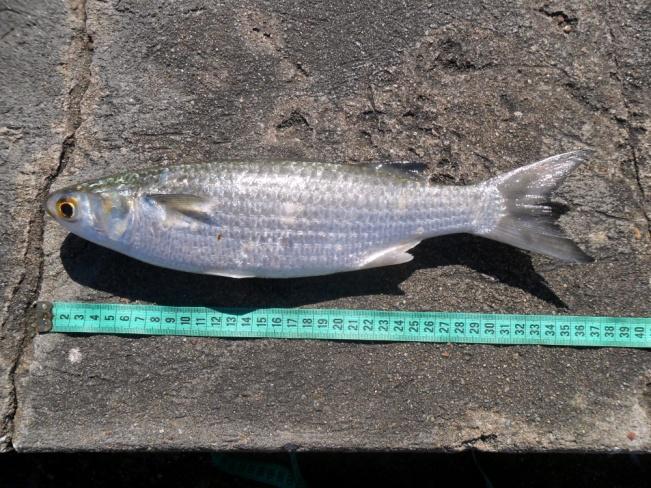*  Photo by José Amorim dos Reis Filho |
| Xareu  (*Caranx hippos*) | *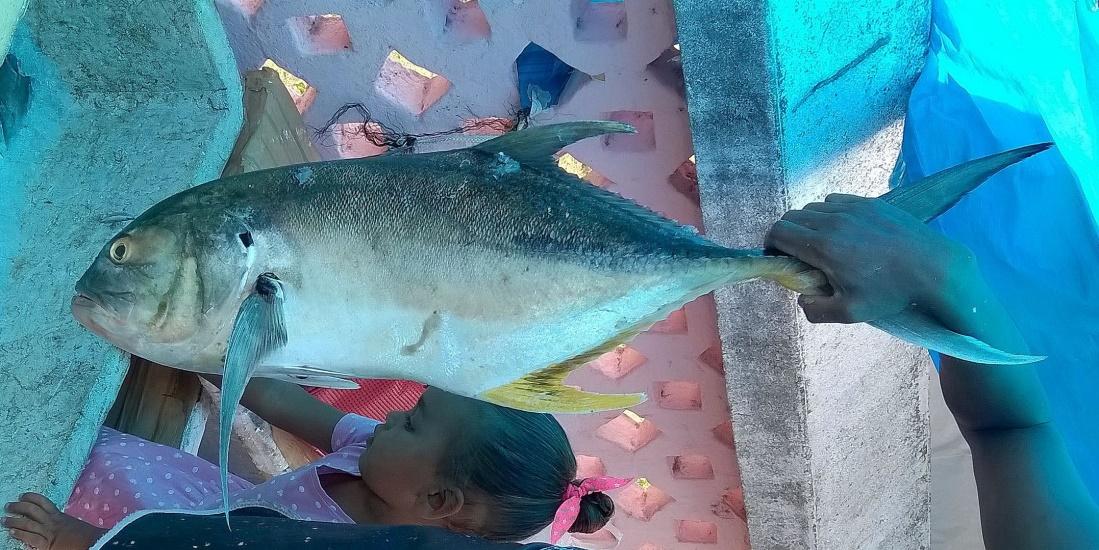*  Photo by author |


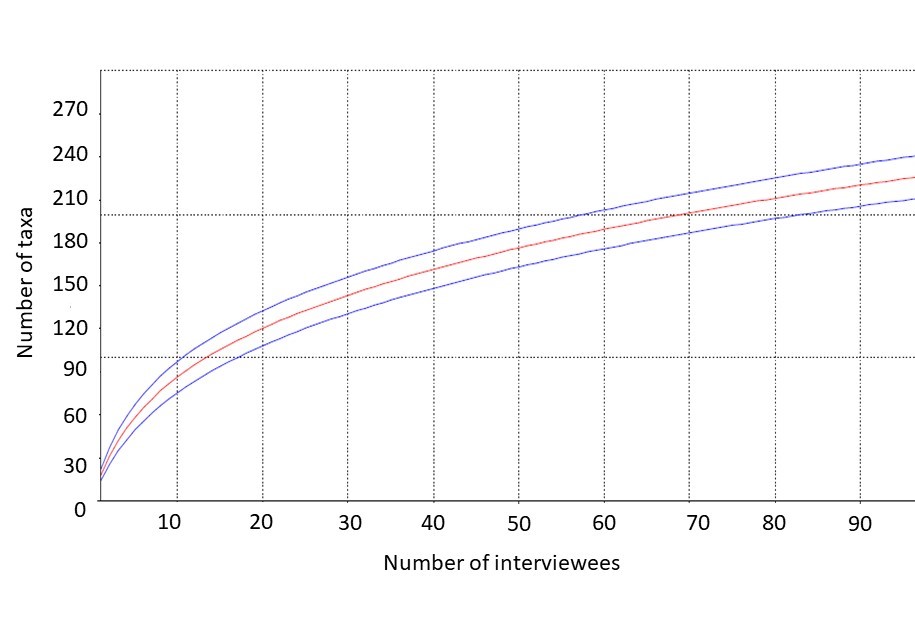


Fig. S1. Free List Rarefied Ethnospecies-interviewee Curve Analysis

Table S2. Complete list of fish saliency according to the participants of the free listing task in Siribinha, Brazil

|  | Ethnospecies | Salience | P value |
| --- | --- | --- | --- |
| 1 | Tainha | 0.717 | <0.001 |
| 2 | Carapeba | 0.584 | <0.001 |
| 3 | Robalão | 0.464 | <0.001 |
| 4 | Robalo branco | 0.386 | <0.001 |
| 5 | Pescada branca | 0.339 | <0.001 |
| 6 | Pescada amarela | 0.330 | <0.001 |
| 7 | Robalo espalmado | 0.303 | <0.001 |
| 8 | Curimã | 0.299 | <0.001 |
| 9 | Vermelho | 0.294 | <0.001 |
| 10 | Robalo | 0.224 | <0.001 |
| 11 | Corvina | 0.220 | <0.001 |
| 12 | Bagre fidalgo | 0.215 | <0.001 |
| 13 | Bagre amarelo | 0.206 | <0.001 |
| 14 | Bagre griaçu | 0.191 | <0.001 |
| 15 | Bagre do mangue | 0.178 | <0.001 |
| 16 | Xareu | 0.171 | <0.001 |
| 17 | Cavala | 0.165 | <0.001 |
| 18 | Sardinha | 0.165 | <0.001 |
| 19 | Pescada barracuda | 0.142 | <0.001 |
| 20 | Bagre uruçu | 0.136 | <0.001 |
| 21 | Cação martelo | 0.132 | <0.001 |
| 22 | Sororoca | 0.115 | 0.001 |
| 23 | Capadinho | 0.109 | 0.002 |
| 24 | Cação | 0.107 | 0.003 |
| 25 | Catana | 0.103 | 0.005 |
| 26 | Bagre cagão | 0.099 | 0.008 |
| 27 | Badejo | 0.088 | 0.025 |
| 28 | Pescada | 0.088 | 0.026 |
| 29 | Caçonete | 0.086 | 0.030 |
| 30 | Arraia | 0.086 | 0.033 |
| 31 | Roncador | 0.084 | 0.039 |
| 32 | Guaricema | 0.083 | 0.041 |
| 33 | Mirucaia | 0.083 | 0.042 |
| 34 | Cação lixa | 0.080 | 0.056 |
| 35 | Caranha | 0.077 | 0.073 |
| 36 | Mero | 0.075 | 0.089 |
| 37 | Pescada cumbucu | 0.072 | 0.121 |
| 38 | Bagre | 0.068 | 0.158 |
| 39 | Barbudo | 0.067 | 0.167 |
| 40 | Cação gaia preta | 0.064 | 0.203 |
| 41 | Cação rabo seco | 0.063 | 0.229 |
| 42 | Arraia pintada | 0.060 | 0.276 |
| 43 | Arraia morcego | 0.056 | 0.343 |
| 44 | Robalo cachorro | 0.055 | 0.363 |
| 45 | Pescadinha | 0.055 | 0.367 |
| 46 | Papa terra | 0.049 | 0.505 |
| 47 | Cação viola | 0.046 | 0.433 |
| 48 | Dentão | 0.043 | 0.366 |
| 49 | Cutupá | 0.042 | 0.342 |
| 50 | Olho de boi | 0.041 | 0.323 |
| 51 | Bonito | 0.040 | 0.302 |
| 52 | Beiju pirá | 0.039 | 0.286 |
| 53 | Bagre branco | 0.038 | 0.278 |
| 54 | Traíra | 0.038 | 0.276 |
| 55 | Boca larga | 0.038 | 0.268 |
| 56 | Robalo corcunda | 0.038 | 0.260 |
| 57 | Pampo | 0.037 | 0.245 |
| 58 | Azeiteira | 0.037 | 0.243 |
| 59 | Arraia jamanta | 0.036 | 0.232 |
| 60 | Baiacu | 0.035 | 0.217 |
| 61 | Robalinho | 0.035 | 0.213 |
| 62 | Vermelha | 0.034 | 0.201 |
| 63 | Amoreia | 0.032 | 0.169 |
| 64 | Carapicum | 0.032 | 0.155 |
| 65 | Galo | 0.031 | 0.149 |
| 66 | Graçaim | 0.031 | 0.148 |
| 67 | Xira | 0.031 | 0.145 |
| 68 | Tilápia | 0.031 | 0.144 |
| 69 | Caramuru | 0.031 | 0.142 |
| 70 | Dourado | 0.030 | 0.136 |
| 71 | Piranha | 0.030 | 0.136 |
| 72 | Gaiuba | 0.030 | 0.129 |
| 73 | Cangurupim | 0.028 | 0.102 |
| 74 | Atum | 0.027 | 0.092 |
| 75 | Cação galinha | 0.026 | 0.089 |
| 76 | Arraia comum | 0.026 | 0.081 |
| 77 | Cação tigre | 0.025 | 0.069 |
| 78 | Carapebinha | 0.024 | 0.064 |
| 79 | Cação branco | 0.022 | 0.052 |
| 80 | Paru | 0.022 | 0.048 |
| 81 | Suia | 0.021 | 0.044 |
| 82 | Tinga | 0.020 | 0.034 |
| 83 | Cação bico doce | 0.018 | 0.026 |
| 84 | Peixe boi | 0.018 | 0.026 |
| 85 | Tubarão | 0.018 | 0.024 |
| 86 | Arraia mijona | 0.018 | 0.023 |
| 87 | Bagre upemba | 0.017 | 0.021 |
| 88 | Corró | 0.017 | 0.020 |
| 89 | Vermelho dentão | 0.017 | 0.019 |
| 90 | Arraia gereba | 0.016 | 0.018 |
| 91 | Pescada jambuiu | 0.016 | 0.016 |
| 92 | Vermelho rabo aberto | 0.016 | 0.016 |
| 93 | Aracanguira | 0.016 | 0.016 |
| 94 | Bagre do rio | 0.015 | 0.014 |
| 95 | Cioba | 0.015 | 0.013 |
| 96 | Arraia branca | 0.014 | 0.012 |
| 97 | Solteira | 0.014 | 0.012 |
| 98 | Cação cabeça lisa | 0.013 | 0.009 |
| 99 | Bagre jundiá | 0.010 | 0.005 |
| 100 | Baleia | 0.010 | 0.005 |
| 101 | Garapau | 0.010 | 0.004 |
| 102 | Cascudinha | 0.010 | 0.004 |
| 103 | Niquim | 0.010 | 0.004 |
| 104 | Robalo coco | 0.010 | 0.004 |
| 105 | Bagre da praia | 0.009 | 0.004 |
| 106 | Bagre do mar | 0.009 | 0.004 |
| 107 | Tainha olho de fogo | 0.009 | 0.004 |
| 108 | Trambitara | 0.009 | 0.004 |
| 109 | Bagre preto | 0.009 | 0.004 |
| 110 | Cação da areia | 0.009 | 0.004 |
| 111 | Peixe porco | 0.009 | 0.004 |
| 112 | Robalo espada | 0.009 | 0.004 |
| 113 | Bagre mandí | 0.009 | 0.004 |
| 114 | Enxova | 0.009 | 0.003 |
| 115 | Barana | 0.009 | 0.003 |
| 116 | Pescada dentão | 0.009 | 0.003 |
| 117 | Bagre barbudo | 0.008 | 0.003 |
| 118 | Bagre cabeçudo | 0.008 | 0.003 |
| 119 | Dorminhoco | 0.008 | 0.003 |
| 120 | Pescada olho de conta | 0.008 | 0.003 |
| 121 | Garoupa | 0.008 | 0.003 |
| 122 | Bagre cangatá | 0.008 | 0.002 |
| 123 | Ariocó | 0.008 | 0.002 |
| 124 | Avacora | 0.008 | 0.002 |
| 125 | Pescada guete | 0.008 | 0.002 |
| 126 | Robalo falcão | 0.008 | 0.002 |
| 127 | Bagre veleiro | 0.008 | 0.002 |
| 128 | Giruna | 0.007 | 0.002 |
| 129 | Língua de vaca | 0.007 | 0.002 |
| 130 | Cação espada | 0.007 | 0.002 |
| 131 | Cação mouriço | 0.007 | 0.002 |
| 132 | Linguado | 0.007 | 0.002 |
| 133 | Gaibira | 0.007 | 0.002 |
| 134 | Piau | 0.007 | 0.002 |
| 135 | Arraia amarela | 0.007 | 0.002 |
| 136 | Tucunaré | 0.007 | 0.002 |
| 137 | Mututuca | 0.006 | 0.002 |
| 138 | Voador | 0.006 | 0.001 |
| 139 | Bagre azul | 0.006 | 0.001 |
| 140 | Arraia manteiga | 0.006 | 0.001 |
| 141 | Vermelho boca negra | 0.006 | 0.001 |
| 142 | Cocelo | 0.006 | 0.001 |
| 143 | Pescada perna de moça | 0.006 | 0.001 |
| 144 | Pescada de água doce | 0.005 | 0.001 |
| 145 | Pescada vermelha | 0.005 | 0.001 |
| 146 | Tapa | 0.005 | 0.001 |
| 147 | Budião azul | 0.005 | 0.001 |
| 148 | Gutupá | 0.005 | 0.001 |
| 149 | Cação treme treme | 0.005 | 0.001 |
| 150 | Mututuca pintada | 0.005 | 0.001 |
| 151 | Pocomon | 0.005 | 0.001 |
| 152 | Cação panã | 0.005 | 0.001 |
| 153 | Caboge | 0.005 | 0.001 |
| 154 | Cara suja | 0.004 | 0.001 |
| 155 | Pescada de água salgada | 0.004 | 0.001 |
| 156 | Vermelho amarelo | 0.004 | 0.001 |
| 157 | Curimatá | 0.004 | <0.001 |
| 158 | Baiacu xareu | 0.004 | <0.001 |
| 159 | Paramirim | 0.004 | <0.001 |
| 160 | Marlim | 0.004 | <0.001 |
| 161 | Olho de cão | 0.004 | <0.001 |
| 162 | Vermelho branco | 0.004 | <0.001 |
| 163 | Peixe morcego | 0.003 | <0.001 |
| 164 | Jabú | 0.003 | <0.001 |
| 165 | Cavalinha | 0.003 | <0.001 |
| 166 | Golfinho | 0.003 | <0.001 |
| 167 | Cação amarelinho | 0.003 | <0.001 |
| 168 | Aratubaia | 0.002 | <0.001 |
| 169 | Cavala aipim | 0.002 | <0.001 |
| 170 | Lauê | 0.002 | <0.001 |
| 171 | Iuiú | 0.002 | <0.001 |
| 172 | Peixe agulha | 0.002 | <0.001 |
| 173 | Cavala manteiga | 0.002 | <0.001 |
| 174 | Pacu | 0.002 | <0.001 |
| 175 | Vermelho saramonete | 0.002 | <0.001 |
| 176 | Muçum | 0.002 | <0.001 |
| 177 | Paru branco | 0.001 | <0.001 |
| 178 | Caranha do rio | 0.001 | <0.001 |
| 179 | Sauara | 0.001 | <0.001 |
| 180 | Carapebota | 0.001 | <0.001 |
| 181 | Corongo | 0.001 | <0.001 |
| 182 | Mandí | 0.001 | <0.001 |
| 183 | Pinima | 0.001 | <0.001 |
| 184 | Tainha curiaçu | 0.001 | <0.001 |
| 185 | Caranha do mar | 0.001 | <0.001 |
| 186 | Pirarucu | 0.001 | <0.001 |
| 187 | Tupa | 0.001 | <0.001 |
| 188 | Lambarí | 0.001 | <0.001 |
| 189 | Acarí | 0.001 | <0.001 |
| 190 | Arraia chapeu de couro | 0.001 | <0.001 |
| 191 | Cação de couro | 0.001 | <0.001 |
| 192 | Tainha patriaçu | 0.001 | <0.001 |
| 193 | Milongo | <0.001 | <0.001 |
| 194 | Suia da lama | <0.001 | <0.001 |
| 195 | Pescada boca larga | <0.001 | <0.001 |
| 196 | Suia do rio | <0.001 | <0.001 |
| 197 | Tainha meio olho | <0.001 | <0.001 |

Table S3. PCA loadings for the inter-interviewee fish distance matrix correlations (see main text Figure 2B).

| LOADINGS | PC 1 | PC 2 |
| --- | --- | --- |
| 1 | -0.111 | -0.101 |
| 2 | -0.023 | -0.018 |
| 3 | 0.011 | -0.440 |
| 4 | -0.058 | -0.157 |
| 5 | 0.038 | 0.058 |
| 6 | 0.220 | -0.272 |
| 7 | -0.206 | 0.147 |
| 8 | 0.176 | -0.140 |
| 9 | 0.306 | -0.181 |
| 10 | -0.183 | -0.010 |
| 11 | 0.036 | 0.177 |
| 12 | -0.291 | -0.095 |
| 13 | 0.135 | 0.091 |
| 14 | 0.157 | -0.014 |
| 15 | 0.219 | -0.068 |
| 16 | -0.361 | -0.012 |
| 17 | 0.291 | 0.130 |
| 18 | 0.113 | 0.145 |
| 19 | -0.231 | 0.094 |
| 20 | 0.043 | 0.345 |
| 21 | -0.163 | 0.034 |
| 22 | -0.260 | 0.061 |
| 23 | 0.053 | 0.001 |
| 24 | 0.190 | -0.082 |
| 25 | 0.236 | 0.466 |
| 26 | 0.029 | 0.071 |
| 27 | 0.240 | 0.192 |
| 28 | 0.051 | -0.156 |
| 29 | -0.075 | 0.277 |
| 30 | 0.133 | -0.171 |
